# Supplementary material for: Change in Police Attendance at Overdose Events following Implementation of a Police Non-Notification Policy in British Columbia
Source: Hindawi journal article supplement (doi:10.1155/2022/8778430), 2022-10-10
Supplement: f1 [file 8778430.f1.docx]

Table 1. Take-Home Naloxone form questions assessing if 911 was called and police.

| V1 question (used in Take-Home Naloxone form up until November 2015) | | |
| --- | --- | --- |
| Was 911 called? | | |
| (i) Yes | | |
| What order did first responders arrive in? | | |
| Firefighters: | Ambulance: | Police: |
| (i) 1st | (i) 1st | (i) 1st |
| (ii) 2nd | (ii) 2nd | (ii) 2nd |
| (iii) 3rd | (iii) 3rd | (iii) 3rd |
| (iv) Did not come | (iv) Did not come | (iv) Did not come |
| (v) 911 was not called | (v) 911 was not called | (v) 911 was not called |
| (vi) Prefer not to say | (vi) Prefer not to say | (vi) Prefer not to say |
| V2 question (used in Take-Home Naloxone form from December 2016 onwards) | | |
| Did anyone call 911? | | |
| (i) Yes | | |
| Did police come to the overdose? | | |
| (i) Yes | | |
| (ii) No | | |
| (iii) Do not know | | |
| (iv) Prefer not to say | | |

Table 2. Reported police attendance at overdose events before and after BCEHS police nonnotification policy.

| Regions in British Columbia (BC) | Overdose events in the prepolicy period (Nov 1, 2015–May 31, 2016) | | Overdose events in the postpolicy period (June 1, 2016–May 31, 2018) | |
| --- | --- | --- | --- | --- |
| Total events (*n*, %) | Police attendance (*n*, %) | Total events (*n*, %) | Police attendance (*n*, %) |
| Vancouver health regiona | 63 (41.2%) | 21 (33.3%) | 110 (11.2%) | 30 (27.3%) |
| All other health regions in BCb | 90 (58.8%) | 64 (71.1%) | 636 (64.8%) | 264 (41.5%) |
| Missing health region |  |  | 236 (24.0%) | 78 (33.1%) |
| Total | 153 (100%) | 85 (55.6%) | 982 (100%) | 372 (37.9%) |

aMost overdoses occurring in Vancouver health region are in the city of Vancouver which is served by Vancouver Police Department who have had police nonattendance policy at overdose events since 2006. bBC’s other health regions are Island, Fraser, and Northern and Interior health regions.

Table 3. Segmented regression model estimates of proportion of police attended overdose events before and after BCEHS police nonnotification policy.

|  | Parameter estimate (95% CI) |
| --- | --- |
| Prepolicy period (Nov 1, 2015–May 31, 2016) | |
| Intercept | 47.93 (29.79, 66.07) |
| Slope | 2.21 (−2.82, 7.25) |
| Postpolicy period (June 1, 2016–May 31, 2018) | |
| Intercept | 48.06 (38.42, 57.71) |
| Slope | −0.98 (−1.70, −0.26) |
